# Supplementary material for: Patterned tailored hydrophobic films designed by synergy effect of electrochemical deposition and chemical deposition
Source: Royal Society of Chemistry journal article supplement (doi:10.1039/c3cc00207a), 2013-01-01
Supplement: c3cc00207a.pdf [file c3cc00207a.pdf]

## Electronic Supplementary Information (ESI)

# **Patterned tailored hydrophobic films designed by synergy effect of electrochemical deposition and chemical deposition**

**Quanyao Yu<sup>a,b</sup> Zhixiang Zeng<sup>a\*</sup> Wenjie Zhao<sup>a</sup> He Li<sup>a</sup> Xuedong Wu<sup>a\*</sup> and Qunji Xue<sup>a</sup>**

<sup>a</sup> Key Laboratory of Marine Protection Materials, Ningbo Institute of Materials Technology and Engineering, Chinese Academy of Sciences, Ningbo 315201, PR China

<sup>b</sup> University of Chinese Academy of Sciences, Beijing 100039, PR China

## Content

SI1. Experimental details

SI2. XPS data of element Ni and P in the film deposited at 80°C

SI3. Roughness variation of films with different solution temperatures

SI4. SEM images of Ni-P and Ni films deposited at different solution temperatures

SI5. XRD patterns of Ni-P films

## SI1. Experimental details

### Experiments

The deposition of superhydrophobic coatings was carried out at the current density of  $150 \text{ mA/cm}^2$  on low alloy steel substrates from electrolytic bath containing  $0.125 \text{ mol/L NiSO}_4 \cdot 6\text{H}_2\text{O}$ ,  $0.05 \text{ mol/L NaH}_2\text{PO}_2$ ,  $0.05 \text{ mol/L citric acid}$ ,  $1.2 \text{ g/L sodium dodecyl sulfate (SDS)}$ , and  $0.075 \text{ g/L 2-Butyne-1,4-diol}$ . And the concentration of  $\text{Na}_2\text{SO}_4$  was adjusted to  $0.3 \text{ mol/L}$  to enhance the electrolyte's ion strength. The pH value of electrolyte was adjusted by the aqueous ammonia to 5.5. All of electrolytes were prepared using analytical grade reagents and deionized water. Prior to electrochemical deposition, substrates were activated in a diluted hydrochloric acid and subsequently cleaned by water. Deposition processes were performed at different temperature ( $60, 65, 70, 75, 80^\circ\text{C}$ ) in a two-electrode electrochemical cell with a Ni plate as the anode and a steel substrate as the cathode. During deposition, the electrolyte was kept stirring with a magnetic stirrer. Pure Ni films were also deposited at the five different temperatures from solution without  $\text{NaH}_2\text{PO}_2$  for comparison.

Surface morphologies of coatings were examined by a scanning electron microscope (SEM, FEI Quanta 250 FEG, US). The micro-structures of films were performed by an X-ray diffraction (XRD, Bruker-AXS: D8 Advance, Germany). The valence state of element Ni

and P in the film deposited at 80 °C were performed by an X-ray photoelectron spectroscopy (AXIS ULTRA<sup>DLD</sup>, England). The surface roughness was measured by a surface profilometer (Alpha-Step IQ, US). Surface contact angle (CA) and contact angle hysteresis (CAH) with water were detected by a contact angle meter (OCA20, Germany). Water droplets with a volume of 2.0 μL were dropped carefully onto surfaces. Before the contact angle performance, all coatings were ultrasonic cleaned in ethanol solution for 10 seconds to eliminate the unexpected contamination. All the tests were performed at room temperature.

## SI 2. XPS data of element Ni and P in the film deposited at 80 °C

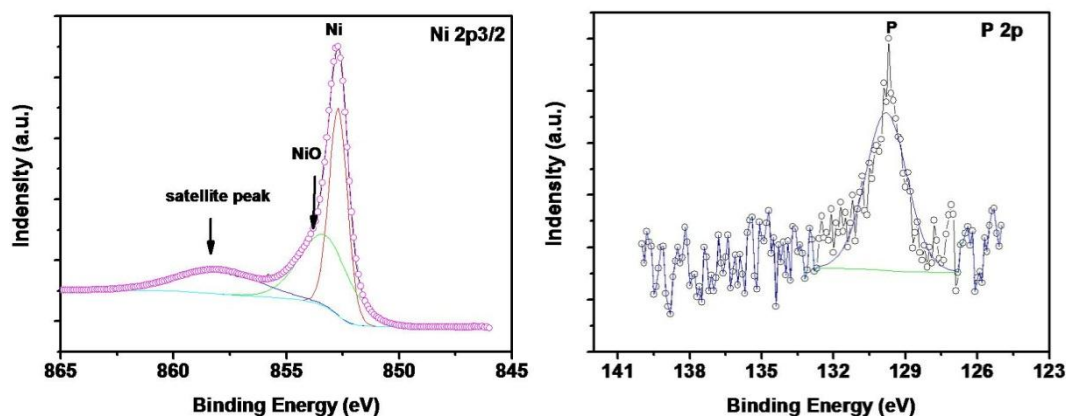

SI2. XPS analysis of element Ni and P in the film deposited at 80 °C. The line-ring curves in the two spectra are the original data obtained by the XPS instrument and the solid curves are fitted curves for different valence states of elements. The data show that element Ni in this film is almost elemental form with a little of oxidation state. The oxidation state of Ni may be formed by the oxidation of oxygen in the air. Element P here is also elemental form comparable to that of phosphorous in its elemental form in red phosphorous.<sup>1-3</sup>

### SI 3. Roughness variation of films with the solution temperatures

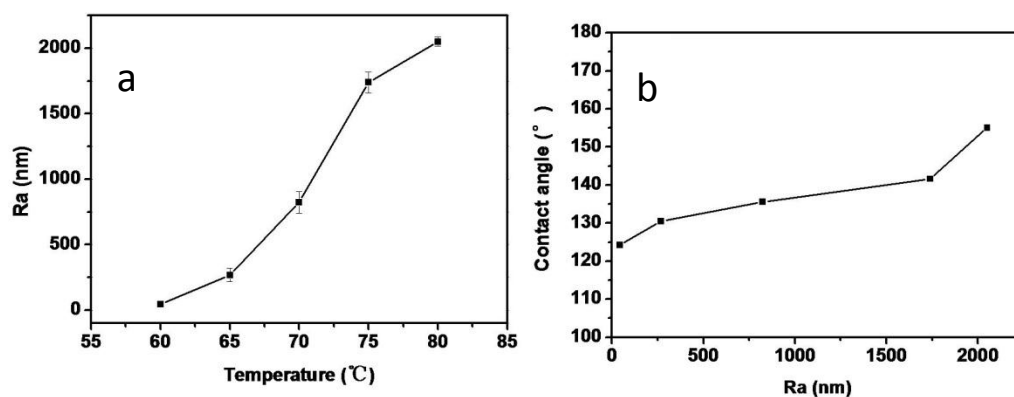

SI 3. a) Roughness variation of films vs. solution temperature. This curve pattern shows that the surface roughness gradually increases along with the solution temperature raising. This regulation has a good correspondence with the variation of film contact angles with water (figure b).

SI 4. SEM images of Ni-P and Ni films deposited at different temperatures

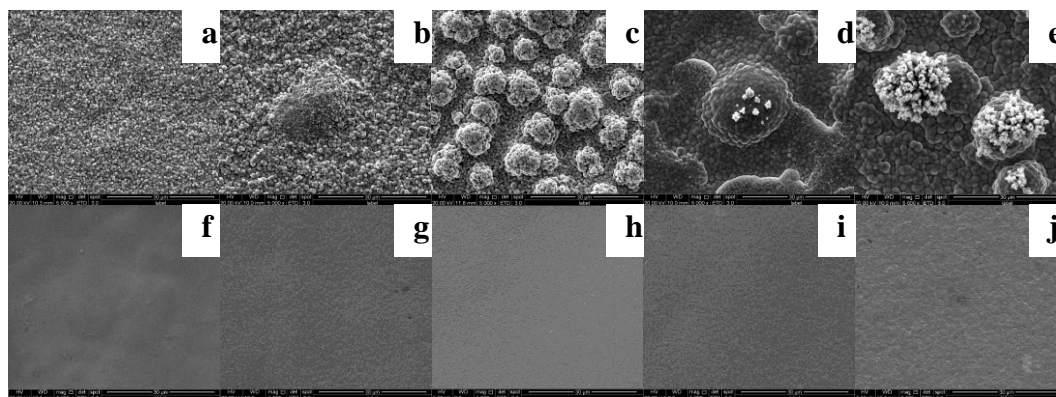

SI 4. The morphology comparison of Ni-P films (a-e) with pure Ni films (f-j) deposited at different temperatures: a, f) 60 °C; b, g) 65 °C; c, h) 70 °C; d, i) 75 °C; e, j) 80 °C. These images clearly show the differences between the Ni-P films and pure Ni films. And the reason caused this phenomena may be the addition of reducing agent  $\text{NaH}_2\text{PO}_2$ , the only variable between the two experiment series.

### SI 5. XRD patterns of Ni-P films

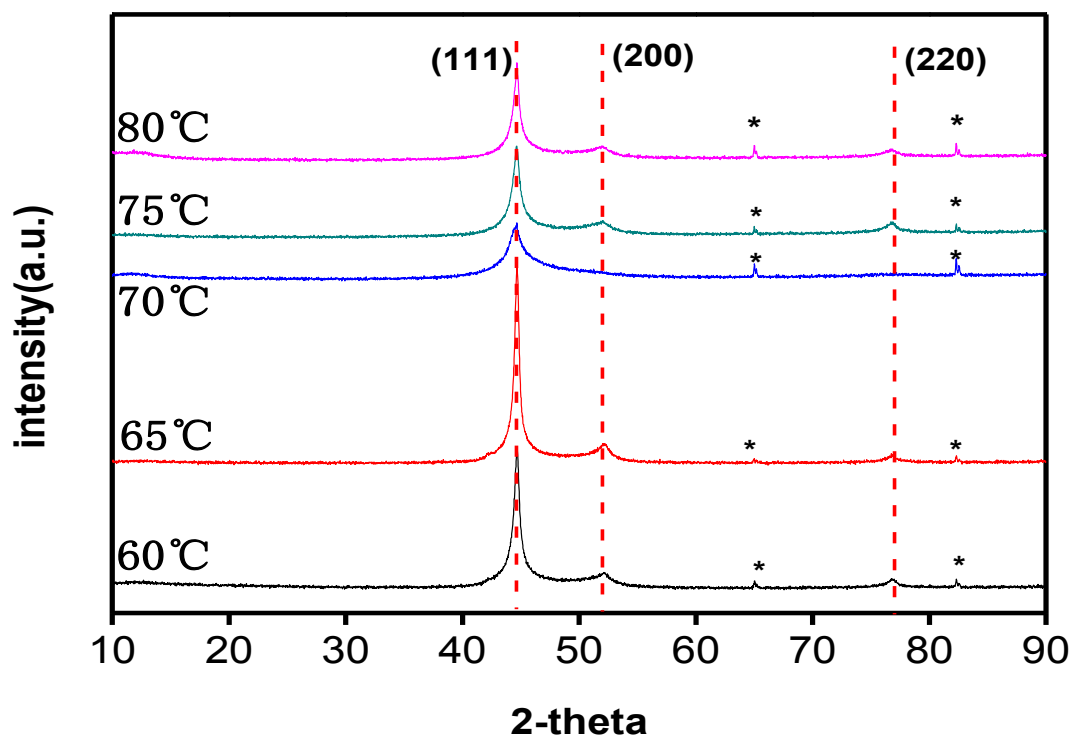

SI 5. XRD patterns of films deposited at different temperatures. Peaks have been indexed in the figure and correspond to Ni crystal structure. These peaks marked by “\*” are indexed to Fe substrates. There is no significant difference between these five spectra.

## References:

1. J. Balaraju, C. Anandan and K. Rajam, *Appl. Surf. Sci.*, 2005, **250**, 88-97.
2. A. S. M. A. Haseeb, P. Chakraborty, I. Ahmed, F. Caccavale and R. Bertinello, *Thin Solid Films*, 1996, **283**, 140-144.
3. M. C. Oliveira and A. M. B. do Rego, *J. Alloys Compd.*, 2006, **425**, 64-68.
